# Supplementary material for: Co-Surfactant-Free Bioactive Protein Nanosheets for the Stabilization of Bioemulsions Enabling Adherent Cell Expansion
Source: PubMed Central journal article supplement (PMC10565825; doi:10.1021/acs.biomac.2c01289), 2023-01-23
Supplement: bm2c01289_si_001.pdf [file bm2c01289_si_001.pdf]

# Co-Surfactant-Free Bioactive Protein Nanosheets for the Stabilisation of Bioemulsions Enabling Adherent Cell Expansion

## Supplementary Information

Alexandra Chrysanthou<sup>1,2</sup>, Minerva Bosch-Fortea<sup>1,2</sup> and Julien E. Gautrot<sup>1,2\*</sup>

<sup>1</sup>Institute of Bioengineering and <sup>2</sup>School of Engineering and Materials Science, Queen Mary, University of London, Mile End Road, London, E1 4NS, UK.

\*Corresponding author. [j.gautrot@qmul.ac.uk](mailto:j.gautrot@qmul.ac.uk)

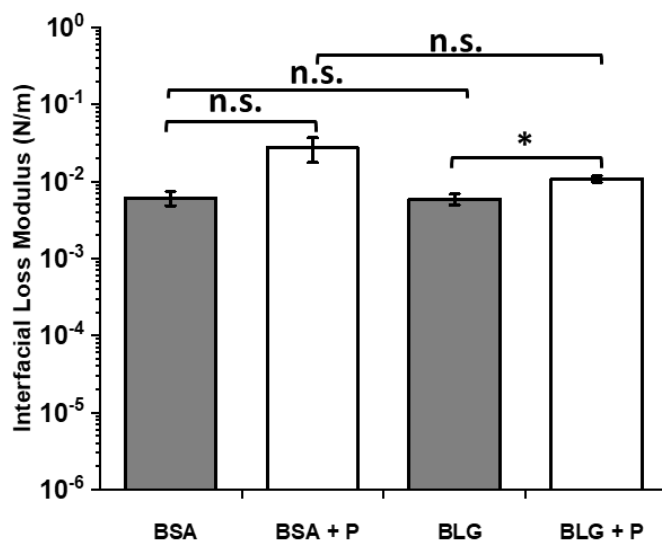

**Supplementary Figure S1.** Interfacial shear loss modulus of BSA, BSA + PFBC, BLG, BLG+PFBC, casein and casein + PFBC at oscillating amplitude  $10^{-4}$  rad and frequency of 1 Hz. Error bars are s.e.m; n=3.

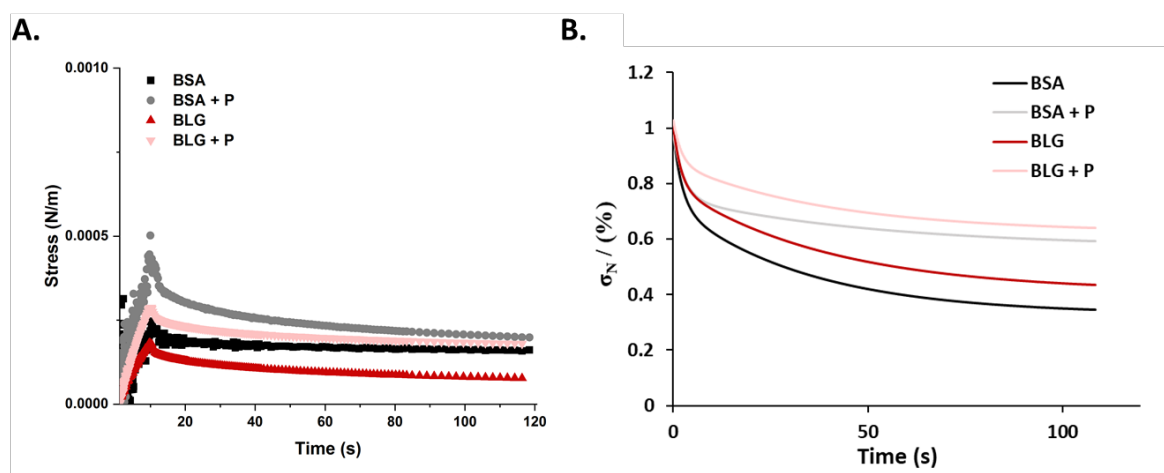

**Supplementary Figure S2.** Stress relaxation experiments carried out on protein nanosheets formed at liquid-liquid interfaces with and without PFBC (10  $\mu\text{g}/\text{mL}$ ). Data is shown as normalised stress ( $\sigma_N$ ) extracted from stress relaxation experiments at a strain 0.5%.

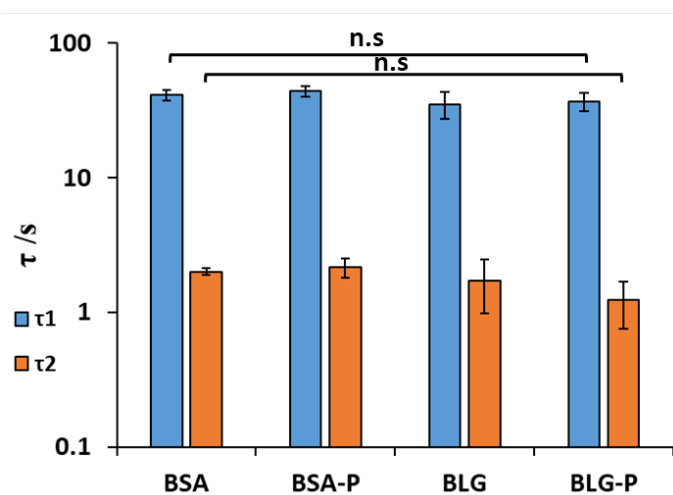

**Supplementary Figure S3.** Characterisation of the stress relaxation profiles associated with protein nanosheets studied. Data were extracted from stress relaxation at a strain of 0.5%. (A) Comparing BSA, BLG and casein (all at 1  $\text{mg}/\text{mL}$ ) with and without PFBC. Error bars are s.e.m;  $n=3$ .

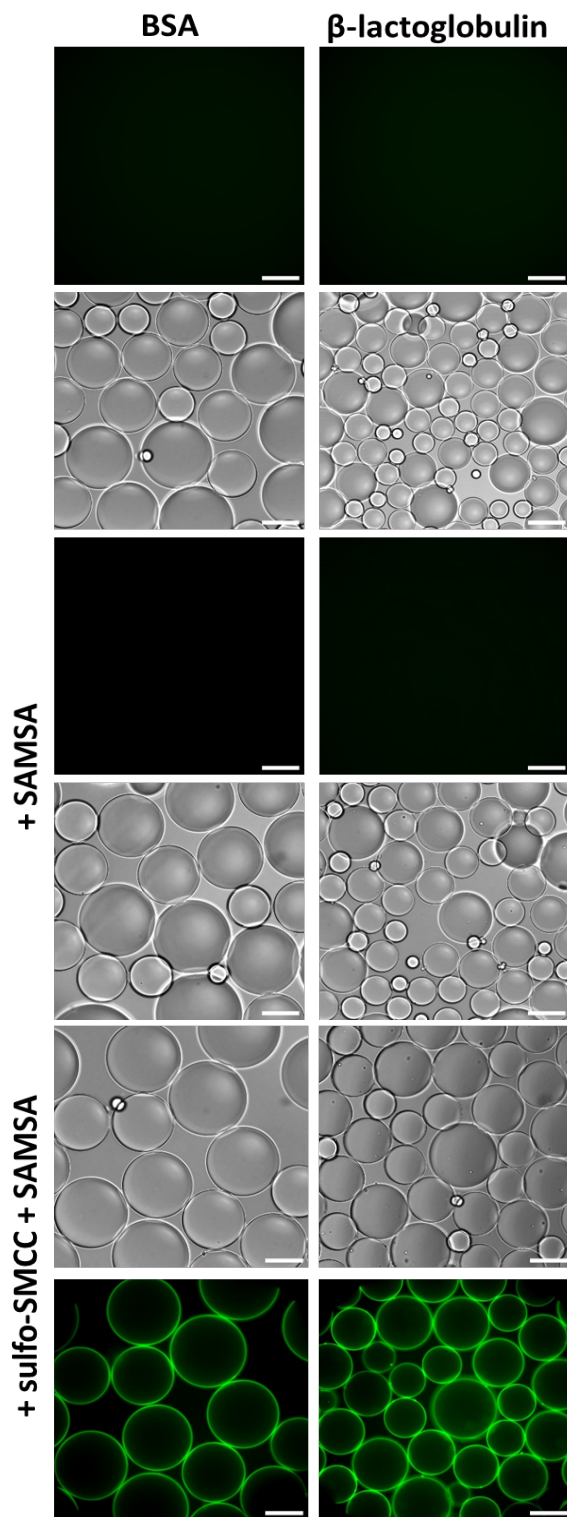

**Supplementary Figure S4.** Epifluorescence microscopy images were SAMSA fluorescein (green, AB F3648) conjugated. Scale bars, 200  $\mu$ m.

A.

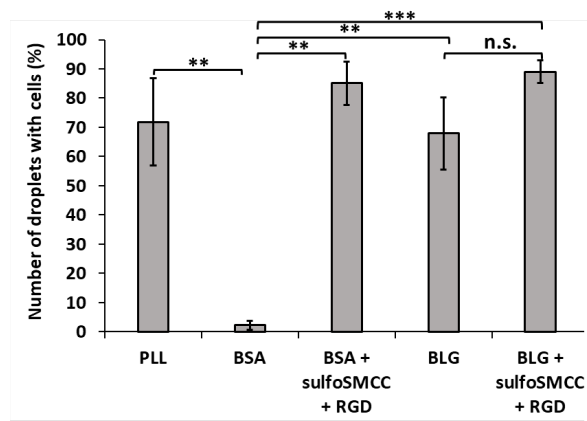

B.

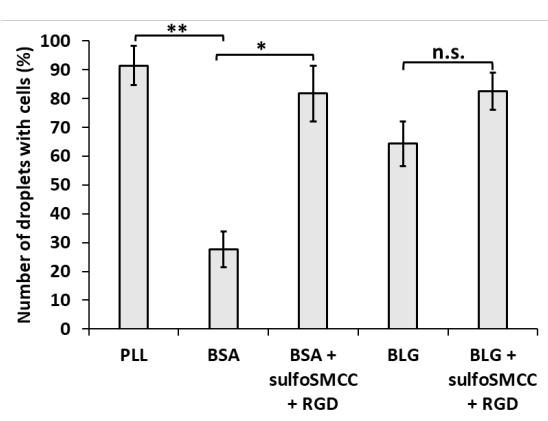

**Supplementary Figure S4.** Percentage number of droplets that were covered with (A) MSCs and (B) HEK293T.

## Supplementary Tables

**Supplementary Table S1** Summary of statistical analysis of storage modulus data obtained by frequency sweep after the proteins were adsorbed at fluorinated-PBS interfaces with and without co-surfactant (PFBC) at 10 µg/ mL .

|                          | MeanDiff | Prob    |     |
|--------------------------|----------|---------|-----|
| BSA + PFBC BSA           | 0.11869  | 0.14564 | n.s |
| BLG + PFBC BLG           | 0.04136  | 0.00209 | **  |
| Casein + PFBC Casein     | 0.10352  | 0.03876 | *   |
| BLG BSA                  | -0.00383 | 0.88433 | n.s |
| Casein BSA               | -0.0356  | 0.0104  | *   |
| Casein BLG               | -0.03177 | 0.01747 | *   |
| BLG + PFBC BSA + PFBC    | -0.08115 | 0.42242 | n.s |
| Casein + PFBC BSA + PFBC | -0.05077 | 0.69215 | n.s |
| Casein + PFBC BLG + PFBC | 0.03038  | 0.8718  | n.s |

**Supplementary Table S2** Summary of statistical analysis of storage modulus data obtained by frequency sweep after the proteins were adsorbed at fluorinated-PBS interfaces with and without co-surfactant (PFBC) at 10 µg/ mL.

|                          | MeanDiff  | Prob    |     |
|--------------------------|-----------|---------|-----|
| BSA + PFBC BSA           | 0.0211    | 0.09442 | n.s |
| BLG + PFBC BLG           | 0.00488   | 0.02317 | *   |
| Casein + PFBC Casein     | 0.03089   | 0.01316 | *   |
| BLG BSA                  | -2.20E-04 | 0.9853  | n.s |
| Casein BSA               | -0.00564  | 0.01322 | *   |
| Casein BLG               | -0.00542  | 0.01583 | *   |
| BLG + PFBC BSA + PFBC    | -0.01644  | 0.29054 | n.s |
| Casein + PFBC BSA + PFBC | 0.00415   | 0.90799 | n.s |
| Casein + PFBC BLG + PFBC | 0.02059   | 0.1718  | n.s |

**Supplementary Table S3** Summary of statistical analysis of data obtained from stress relaxation experiments at a strain of 0.5 % .

|                | MeanDiff | Prob    |     |
|----------------|----------|---------|-----|
| BSA-P BSA      | 22.55267 | 0.09127 | n.s |
| BLG-P BLG      | 11.965   | 0.06436 | n.s |
| BLG-P BSA-P    | -2.98533 | 0.9436  | n.s |
| Casein-P BSA-P | -26.076  | 0.06569 | n.s |

|                |          |         |     |
|----------------|----------|---------|-----|
| Casein-P BLG-P | -23.0907 | 0.00896 | **  |
| BLG BSA        | 7.60233  | 0.01709 | *   |
| BLG BSA-P      | -14.9503 | 0.21667 | n.s |

**Supplementary Table S4** Summary of statistical analysis of data of  $\tau_1$  values obtained from stress relaxation experiments at a strain of 0.5 %.

|                   | MeanDiff | Prob    |     |
|-------------------|----------|---------|-----|
| t1 BLG t1 BSA     | 1.48429  | 0.99375 | n.s |
| t1 BSA-P t1 BSA   | 5.88717  | 0.74876 | n.s |
| t1 BSA-P t1 BLG   | 4.40288  | 0.87215 | n.s |
| t1 BLG-P t1 BSA   | 8.50963  | 0.50131 | n.s |
| t1 BLG-P t1 BLG   | 7.02534  | 0.64101 | n.s |
| t1 BLG-P t1 BSA-P | 2.62246  | 0.96783 | n.s |

**Supplementary Table S5** Summary of statistical analysis of data of  $\tau_2$  values obtained from stress relaxation experiments at a strain of 0.5 %.

|                   | MeanDiff | Prob    |     |
|-------------------|----------|---------|-----|
| t2 BLG t2 BSA     | -0.49612 | 0.84427 | n.s |
| t2 BSA-P t2 BSA   | 0.76719  | 0.60681 | n.s |
| t2 BSA-P t2 BLG   | 1.26331  | 0.23655 | n.s |
| t2 BLG-P t2 BSA   | 0.92303  | 0.46832 | n.s |
| t2 BLG-P t2 BLG   | 1.41916  | 0.16735 | n.s |
| t2 BLG-P t2 BSA-P | 0.15585  | 0.99356 | n.s |

**Supplementary Table S6** Summary of statistical analysis of data obtained from the SPR data for the protein binding (1 mg/mL) at the perfluorodecanethiol pre-treated chips.

|                                        | MeanDiff | Prob    |     |
|----------------------------------------|----------|---------|-----|
| $\beta$ -lactoglobulin BSA             | 461.2667 | 0.45494 | n.s |
| $\beta$ -casein BSA                    | 1184.367 | 0.03828 | *   |
| $\beta$ -casein $\beta$ -lactoglobulin | 723.1    | 0.19123 | n.s |

**Supplementary Table S7** Summary of statistical analysis of data obtained from the SPR data for the sulfo-SMCC (2 mg/mL) at the surface of protein layers (BSA, BLG and casein).

|                                        | MeanDiff | Prob    |     |
|----------------------------------------|----------|---------|-----|
| $\beta$ -lactoglobulin BSA             | 105.0667 | 0.93711 | n.s |
| $\beta$ -casein BSA                    | -80.7333 | 0.9622  | n.s |
| $\beta$ -casein $\beta$ -lactoglobulin | -185.8   | 0.81995 | n.s |

**Supplementary Table S8** Summary of statistical analysis of data obtained from the SPR data for the RGD (1.6 mg/mL) at the surface of the sulfo-SMCC layer.

|                                        | <b>MeanDiff</b> | <b>Prob</b> |            |
|----------------------------------------|-----------------|-------------|------------|
| $\beta$ -lactoglobulin BSA             | 26.06667        | 0.88869     | <b>n.s</b> |
| $\beta$ -casein BSA                    | 47.4            | 0.68847     | <b>n.s</b> |
| $\beta$ -casein $\beta$ -lactoglobulin | 21.33333        | 0.92352     | <b>n.s</b> |

**Supplementary Table S9** Summary of statistical analysis of data obtained from the epifluorescence images for the SAMSA-fluorescein binding on BSA, BLG and casein emulsion droplets in the presence and absence of sulfo-SMCC.

|                                  | <b>MeanDiff</b> | <b>Prob</b> |            |
|----------------------------------|-----------------|-------------|------------|
| <b>BLG BSA</b>                   | -23.5313        | 0.93412     | <b>n.s</b> |
| <b>Casein BSA</b>                | -37.1652        | 0.8461      | <b>n.s</b> |
| <b>Casein BLG</b>                | -13.6339        | 0.97721     | <b>n.s</b> |
| <b>BLG BSA</b>                   | -23.5313        | 0.99966     | <b>n.s</b> |
| <b>Casein BSA</b>                | -37.1652        | 0.997       | <b>n.s</b> |
| <b>Casein BLG</b>                | -13.6339        | 0.99998     | <b>n.s</b> |
| <b>BSA + SAMSA BSA</b>           | 127.9757        | 0.63783     | <b>n.s</b> |
| <b>BSA + SAMSA BLG</b>           | 151.507         | 0.47613     | <b>n.s</b> |
| <b>BSA + SAMSA Casein</b>        | 165.1409        | 0.39065     | <b>n.s</b> |
| <b>BLG + SAMSA BSA</b>           | 6.54822         | 1           | <b>n.s</b> |
| <b>BLG + SAMSA BLG</b>           | 30.07956        | 0.9989      | <b>n.s</b> |
| <b>BLG + SAMSA Casein</b>        | 43.71344        | 0.99363     | <b>n.s</b> |
| <b>BLG + SAMSA BSA + SAMSA</b>   | -121.427        | 0.68331     | <b>n.s</b> |
| <b>Casein+ SAMSA BSA</b>         | 40.45822        | 0.99554     | <b>n.s</b> |
| <b>Casein+ SAMSA BLG</b>         | 63.98956        | 0.96608     | <b>n.s</b> |
| <b>Casein+ SAMSA Casein</b>      | 77.62344        | 0.9267      | <b>n.s</b> |
| <b>Casein+ SAMSA BSA + SAMSA</b> | -87.5174        | 0.88595     | <b>n.s</b> |
| <b>Casein+ SAMSA BLG + SAMSA</b> | 33.91           | 0.99805     | <b>n.s</b> |

|                            |                          |          |          |     |
|----------------------------|--------------------------|----------|----------|-----|
| BLG + sulfo-SMCC + SAMSA   | BSA + sulfo-SMCC + SAMSA | -649.481 | 0.53284  | n.s |
| Casein+ sulfo-SMCC + SAMSA | BSA + sulfo-SMCC + SAMSA | 96.22956 | 0.98474  | n.s |
| Casein+ sulfo-SMCC + SAMSA | BLG + sulfo-SMCC + SAMSA | 745.7107 | 0.44729  | n.s |
| BSA + sulfo-SMCC + SAMSA   | BSA                      | 4146.55  | 8.79E-04 | *** |
| BLG + sulfo-SMCC + SAMSA   | BLG                      | 3520.6   | 2.10E-04 | *** |
| Casein+ sulfo-SMCC + SAMSA | Casein                   | 4279.945 | 7.43E-04 | *** |

**Supplementary Table S10** Summary of statistical analysis of data obtained from cell (MSCs) on emulsion droplets after seven days in culture.

|                                             | MeanDiff | Prob     |     |
|---------------------------------------------|----------|----------|-----|
| PLL TCP                                     | -17544.4 | 0.36446  | n.s |
| BSA TCP                                     | -75266.7 | 1.52E-05 | *** |
| BSA PLL                                     | -57722.2 | 2.16E-04 | *** |
| BLG TCP                                     | -30788.9 | 0.03204  | *** |
| BLG PLL                                     | -13244.4 | 0.63719  | n.s |
| BLG BSA                                     | 44477.78 | 0.00222  | **  |
| BSA +sulfo-SMCC + RGD TCP                   | -29829.6 | 0.03876  | *   |
| BSA +sulfo-SMCC + RGD PLL                   | -12285.2 | 0.70135  | n.s |
| BSA +sulfo-SMCC + RGD BSA                   | 45437.04 | 0.00186  | **  |
| BSA +sulfo-SMCC + RGD BLG                   | 959.2593 | 1        | n.s |
| BLG +sulfo-SMCC + RGD TCP                   | -15144.4 | 0.50989  | n.s |
| BLG +sulfo-SMCC + RGD PLL                   | 2400     | 0.99969  | n.s |
| BLG +sulfo-SMCC + RGD BSA                   | 60122.22 | 1.46E-04 | *** |
| BLG +sulfo-SMCC + RGD BLG                   | 15644.44 | 0.47765  | n.s |
| BLG +sulfo-SMCC + RGD BSA +sulfo-SMCC + RGD | 14685.19 | 0.54015  | n.s |

**Supplementary Table S11** Summary of statistical analysis of data obtained from cell (HEK293T) on emulsion droplets after seven days in culture.

|                                             | MeanDiff | Prob    |     |
|---------------------------------------------|----------|---------|-----|
| BSA +sulfo-SMCC + RGD BSA                   | 284000   | 0.0242  | *   |
| BLG +sulfo-SMCC + RGD BLG                   | 297944.4 | 0.02759 | *   |
| BSA +sulfo-SMCC + RGD TCP                   | -146056  | 0.25486 | n.s |
| BLG +sulfo-SMCC + RGD TCP                   | -148444  | 0.24588 | n.s |
| BLG +sulfo-SMCC + RGD BSA +sulfo-SMCC + RGD | -2388.89 | 0.99953 | n.s |



**Supplementary Table S12** Summary of statistical analysis of data obtained from the number of droplets covered with cells (MSCs) on emulsion droplets after seven days in culture.

|                                                    | <b>MeanDiff</b> | <b>Prob</b> |            |
|----------------------------------------------------|-----------------|-------------|------------|
| <b>BSA PLL</b>                                     | -69.5612        | 0.00242     | <b>**</b>  |
| <b>BSA + sulfoSMCC + RGD PLL</b>                   | 6.0635          | 0.98904     | <b>n.s</b> |
| <b>BSA + sulfoSMCC + RGD BSA</b>                   | 75.62472        | 0.00129     | <b>**</b>  |
| <b>BLG PLL</b>                                     | -3.88011        | 0.99801     | <b>n.s</b> |
| <b>BLG BSA</b>                                     | 65.68111        | 0.00367     | <b>**</b>  |
| <b>BLG BSA + sulfoSMCC + RGD</b>                   | -9.94361        | 0.93631     | <b>n.s</b> |
| <b>BLG + sulfoSMCC + RGD PLL</b>                   | 17.19101        | 0.689       | <b>n.s</b> |
| <b>BLG + sulfoSMCC + RGD BSA</b>                   | 86.75223        | 4.32E-04    | <b>***</b> |
| <b>BLG + sulfoSMCC + RGD BSA + sulfoSMCC + RGD</b> | 11.12751        | 0.90814     | <b>n.s</b> |
| <b>BLG + sulfoSMCC + RGD BLG</b>                   | 21.07113        | 0.52247     | <b>n.s</b> |

**Supplementary Table S13** Summary of statistical analysis of data obtained from the number of droplets covered with cells (MSCs) on emulsion droplets after seven days in culture.

|                                                    | <b>MeanDiff</b> | <b>Prob</b> |            |
|----------------------------------------------------|-----------------|-------------|------------|
| <b>BSA PLL</b>                                     | -63.759         | 0.00328     | <b>**</b>  |
| <b>BSA + sulfoSMCC + RGD PLL</b>                   | -9.69143        | 0.932       | <b>n.s</b> |
| <b>BSA + sulfoSMCC + RGD BSA</b>                   | 54.06757        | 0.01017     | <b>*</b>   |
| <b>BLG PLL</b>                                     | -27.1195        | 0.26481     | <b>n.s</b> |
| <b>BLG BSA</b>                                     | 36.63949        | 0.08696     | <b>n.s</b> |
| <b>BLG BSA + sulfoSMCC + RGD</b>                   | -17.4281        | 0.64397     | <b>n.s</b> |
| <b>BLG + sulfoSMCC + RGD PLL</b>                   | -8.80211        | 0.95079     | <b>n.s</b> |
| <b>BLG + sulfoSMCC + RGD BSA</b>                   | 54.9569         | 0.00914     | <b>**</b>  |
| <b>BLG + sulfoSMCC + RGD BSA + sulfoSMCC + RGD</b> | 0.88933         | 0.99999     | <b>n.s</b> |
| <b>BLG + sulfoSMCC + RGD BLG</b>                   | 18.31741        | 0.60368     | <b>n.s</b> |
